# Supplementary material for: Antitumor Mechanisms of Amino Acid Hydroxyurea Derivatives in the Metastatic Colon Cancer Model
Source: Int J Mol Sci. 2013 Dec 4;14(12):23654–71. doi: 10.3390/ijms141223654 (PMC3876069; doi:10.3390/ijms141223654)
Supplement: Supplementary file 1 [file ijms-14-23654-s001.pdf]

## Supplementary Information

**Table S1.** Annexin-V test results for SW620 cells treated with BOU or MHCU at concentrations of 1 and 50  $\mu$ M for 24 and 72 h.

|      |                         | Number of cells (%) |                   |                    |                    |                     |
|------|-------------------------|---------------------|-------------------|--------------------|--------------------|---------------------|
|      |                         | Control             | BOU,<br>1 $\mu$ M | BOU,<br>50 $\mu$ M | MHCU,<br>1 $\mu$ M | MHCU,<br>50 $\mu$ M |
| 24 h | Early apoptosis         | 1.9                 | 0.8               | 8.7 *              | 1.7                | 0.9                 |
|      | Late apoptosis/necrosis | 2.2                 | 1.0               | 11.4 *             | 5.5 *              | 7.8 *               |
| 72 h | Early apoptosis         | 0.7                 | 0.4               | 2.4 *              | 1.6                | 0.5                 |
|      | Late apoptosis/necrosis | 2.5                 | 3.7               | 6.4 *              | 6.2 *              | 8.7 *               |

\* statistically significant.

**Table S2.** Differentially expressed proteins in SW620 cells treated with BOU at a concentration of 50  $\mu$ M for 24 and 72 h.

| Protein                                                                                       | Abbreviation | Cellular process                                          | Accession number | Expression level | Treatment (h) |
|-----------------------------------------------------------------------------------------------|--------------|-----------------------------------------------------------|------------------|------------------|---------------|
| Far upstream element binding protein 1<br>(FUSE binding protein 1)<br>(DNA helicase V)        | FUBP1        | Proliferation                                             | Q96AE4           | Control          | 24/72         |
| Plasminogen activator inhibitor 1<br>RNA- binding protein                                     | PAI-RBP1     | Tumor<br>invasion and<br>metastasis                       | Q8NC51           | Control          | 24/72         |
| Proliferating cell nuclear antigen                                                            | PCNA         | DNA,<br>synthesis,<br>repair, cell<br>cycle<br>regulation | Q6FHF5           | Control          | 24            |
| Heterogeneous nuclear<br>ribonucleoprotein B1-human                                           | HNRPB1       | Proliferation,<br>repair                                  | P22626           | Control          | 24            |
| DJ-1 protein (Oncogene DJ1)                                                                   | PARK7        | Sensor for<br>oxidative<br>stress,<br>cell-growth         | Q99497           | Control          | 24/72         |
| Transgelin 2                                                                                  | TAGLN2       | Cytoskeleton/<br>structural,<br>CRC marker                | P37802           | Control          | 24            |
| Phosphatidylethanolamine-binding<br>protein                                                   | PEBP1        | Antiapoptotic                                             | P30086           | Control          | 24            |
| Transcription factor BTF3<br>(Basic transcription factor 3)<br>(General transcription factor) | BTF3         | Transcription<br>and<br>modulation of<br>apoptosis        | P20290           | Control          | 24            |
| Profilin 1 (Profilin I)                                                                       | PFN1         | Proliferation,<br>migration                               | P07737           | Control          | 24/72         |

Table S2. Cont.

| Protein                                                                             | Abbreviation | Cellular process                                        | Accession number | Expression level | Treatment (h) |
|-------------------------------------------------------------------------------------|--------------|---------------------------------------------------------|------------------|------------------|---------------|
| Chaperonin 10                                                                       | HSPE1        | Suppression of T-cell expression                        | P61604           | Control          | 24            |
| DnaK-type molecular chaperone-human                                                 | Hsp70        | Antiapoptotic, proliferation                            | P11142           | ↓                | 24            |
| Heterogeneous nuclear ribonucleoprotein L                                           | hnRNP L      | Regulation of transcription                             | P14866           | Control          | 72            |
| Stress-induced-phosphoprotein 1 (Hsc70/Hsp90-organizing protein) (Hop)              | STIP1        | Proliferation, antiapoptotic                            | P31948           | Control          | 72            |
| TAR DNA-binding protein-43                                                          | TDP-43       | Transcriptional repression and mRNA and mRNA processing | Q13148           | Control          | 72            |
| Eukaryotic translation initiation factor 3 subunit 4                                | EIF3S4       | Translation                                             | O75821           | Control          | 72            |
| Poly(rC) binding protein 1                                                          | PCBP1        | Antiapoptotic                                           | Q15365           | Control          | 72            |
| GTP binding protein RanBP1                                                          | RANBP1       | Mitosis                                                 | P43487           | Control          | 72            |
| Thioredoxin-dependent peroxide reductase, mitochondrial precursor (Peroxiredoxin 3) | PRDX3        | Oxidative stress                                        | P30048           | Control          | 72            |
| Phosphoglycerate mutase                                                             | PGAM         | Glycolysis                                              | P18669           | Control          | 72            |
| Eukaryotic translation initiation factor 4H                                         | eIF-4H       | Translation                                             | Q15056           | Control          | 72            |
| Galectin-3 (Galactose-specific lectin 3 (Mac-2 antigen))                            | Gal-3        | Proliferation, adhesiveness, apoptosis, CRC marker      | P17931           | Control          | 72            |
| Nucleoside-diphosphate kinase, nm23-H1g                                             | nm23         | Phosphorylation                                         | P15531           | Control          | 72            |
| Translation initiation factor eIF-5A                                                | eIF-5A       | Translation                                             | P63241           | Control          | 72            |
| Stathmin (Phosphoprotein p19) (Oncoprotein 18)                                      | Op18         | Proliferation                                           | P16949           | Control          | 72            |
| Cofilin, non-muscle isoform (Cofilin-1) (18 kD phosphoprotein)                      | CFL1         | Cell migration                                          | P23528           | Control          | 72            |
| ENO1 protein, 2-phosphopyruvate-hydratase alpha-enolase                             | ENO1         | Proliferation, motility, apoptosis, glycolysis          | P06733           | Control/↓        | 72            |
| 40S ribosomal protein S12                                                           | RPS12        | Translation                                             | P25398           | Control          | 72            |
| Triosephosphate isomerase                                                           | TIM          | Glycolysis, metastasis                                  | P60174           | ↓                | 72            |

Control – expressed only in untreated cells; ↓ – down-regulated in treated cells.

**Table S3.** Differentially expressed proteins in SW620 cells treated with MHCU at a concentration of 50  $\mu$ M for 24 and 72 h.

| Protein                                                                                        | Abbreviation     | Cellular process                                                | Accession no. | Expression level | Treatment (h) |
|------------------------------------------------------------------------------------------------|------------------|-----------------------------------------------------------------|---------------|------------------|---------------|
| Calreticulin                                                                                   | CRT              | Chaperonin, regulation of Ca(2+), inflammation                  | P27797        | Control          | 24            |
| Immunophilin FKBP52 (FK506 binding protein 4)                                                  | FKBP52           | Microtubule depolymerization                                    | Q02790        | ↑                | 24            |
| T-complex protein 1, alpha subunit                                                             | TCP-1-alpha      | Protein folding, apoptosis                                      | P17987        | ↑                | 24            |
| Translation initiation factor eIF-5A                                                           | eIF-5A           | Translation                                                     | P63241        | ↑                | 24            |
| Fatty acid binding protein, epidermal (psoriasis associated)                                   | E-FABP           | Metabolism                                                      | Q01469        | ↑                | 24            |
| Glyceraldehyde-3-phosphate dehydrogenase                                                       | GAPDH            | Metabolism, glycolysis                                          | P04406        | ↓                | 24            |
| T-complex protein 1, gamma subunit                                                             | TCP-1-gamma      | Protein folding, apoptosis                                      | P49368        | Treated          | 24            |
| High mobility group protein 1                                                                  | HMG-1            | Transcription factors, tumor progression                        | P09429        | Control          | 72            |
| Ras-related protein Rab-11A, GTP-binding protein Rab 11                                        | Rab-11A          | Endosomal trafficking, cytokinesis                              | P62491        | Control          | 72            |
| FK506-binding protein 1A (Peptidyl-prolyl cis-trans isomerase)                                 | FKBP1A           | Protein folding, signal transduction, cell cycle regulation     | P62942        | Control          | 72            |
| Ubiquitin                                                                                      | Ub               | Cell cycle regulation, signal transduction, and stress response | P02248        | Control          | 72            |
| Annexin 1                                                                                      | ANX1             | Anti-inflammatory, differentiation, proliferation, apoptosis    | Q05BR2        | ↑                | 72            |
| Hydroxyacyl-Coenzyme A dehydrogenase, type II                                                  | HADH2            | Metabolism                                                      | Q6IBS9        | ↓                | 72            |
| Serine hydroxymethyltransferase mitochondrial precursor (Serine methylase)                     | SHMT2            | Metabolism, proliferation                                       | P34897        | ↓                | 72            |
| Peroxiredoxin 2 (Thioredoxin peroxidase 1)                                                     | PRDX2            | Oxidative stress                                                | P32119        | ↓                | 72            |
| Dihydrolipoyl dehydrogenase, mitochondrial precursor                                           | DLD              | Metabolism                                                      | P09622        | Treated          | 72            |
| Eukaryotic translation initiation factor 3 subunit 2 (TGF-beta receptor interacting protein 1) | TRIP-1 eIF3 beta | Cell signaling, ribosome assembly                               | Q13347        | Treated          | 72            |

Control – identified only in untreated cells; Treated – identified only in treated cells; ↓ – down-regulated in treated cells;

↑ – up-regulated in treated cells.
